# Supplementary material for: Preferential Release of Newly Synthesized Insulin Assessed by a Multi-Label Reporter System Using Pancreatic β-Cell Line MIN6
Source: PubMed Central journal article supplement (PMC3485036; doi:10.1371/journal.pone.0047921), 2012-10-25

**Figure S4 Hou et al.**

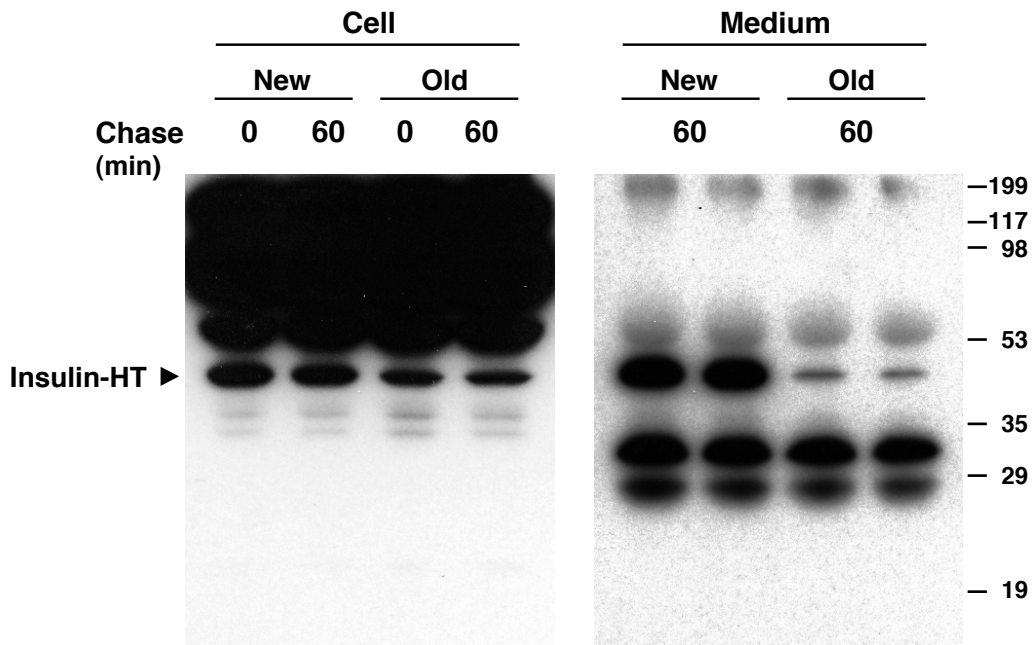

Supplement: pone.0047921.s004.pdf [file pone.0047921.s004.pdf]
