# Supplementary material for: Preferential Release of Newly Synthesized Insulin Assessed by a Multi-Label Reporter System Using Pancreatic β-Cell Line MIN6
Source: PLOS journal article supplement (doi:10.1371/journal.pone.0047921), 2012-10-25

Figure S3 Hou et al.

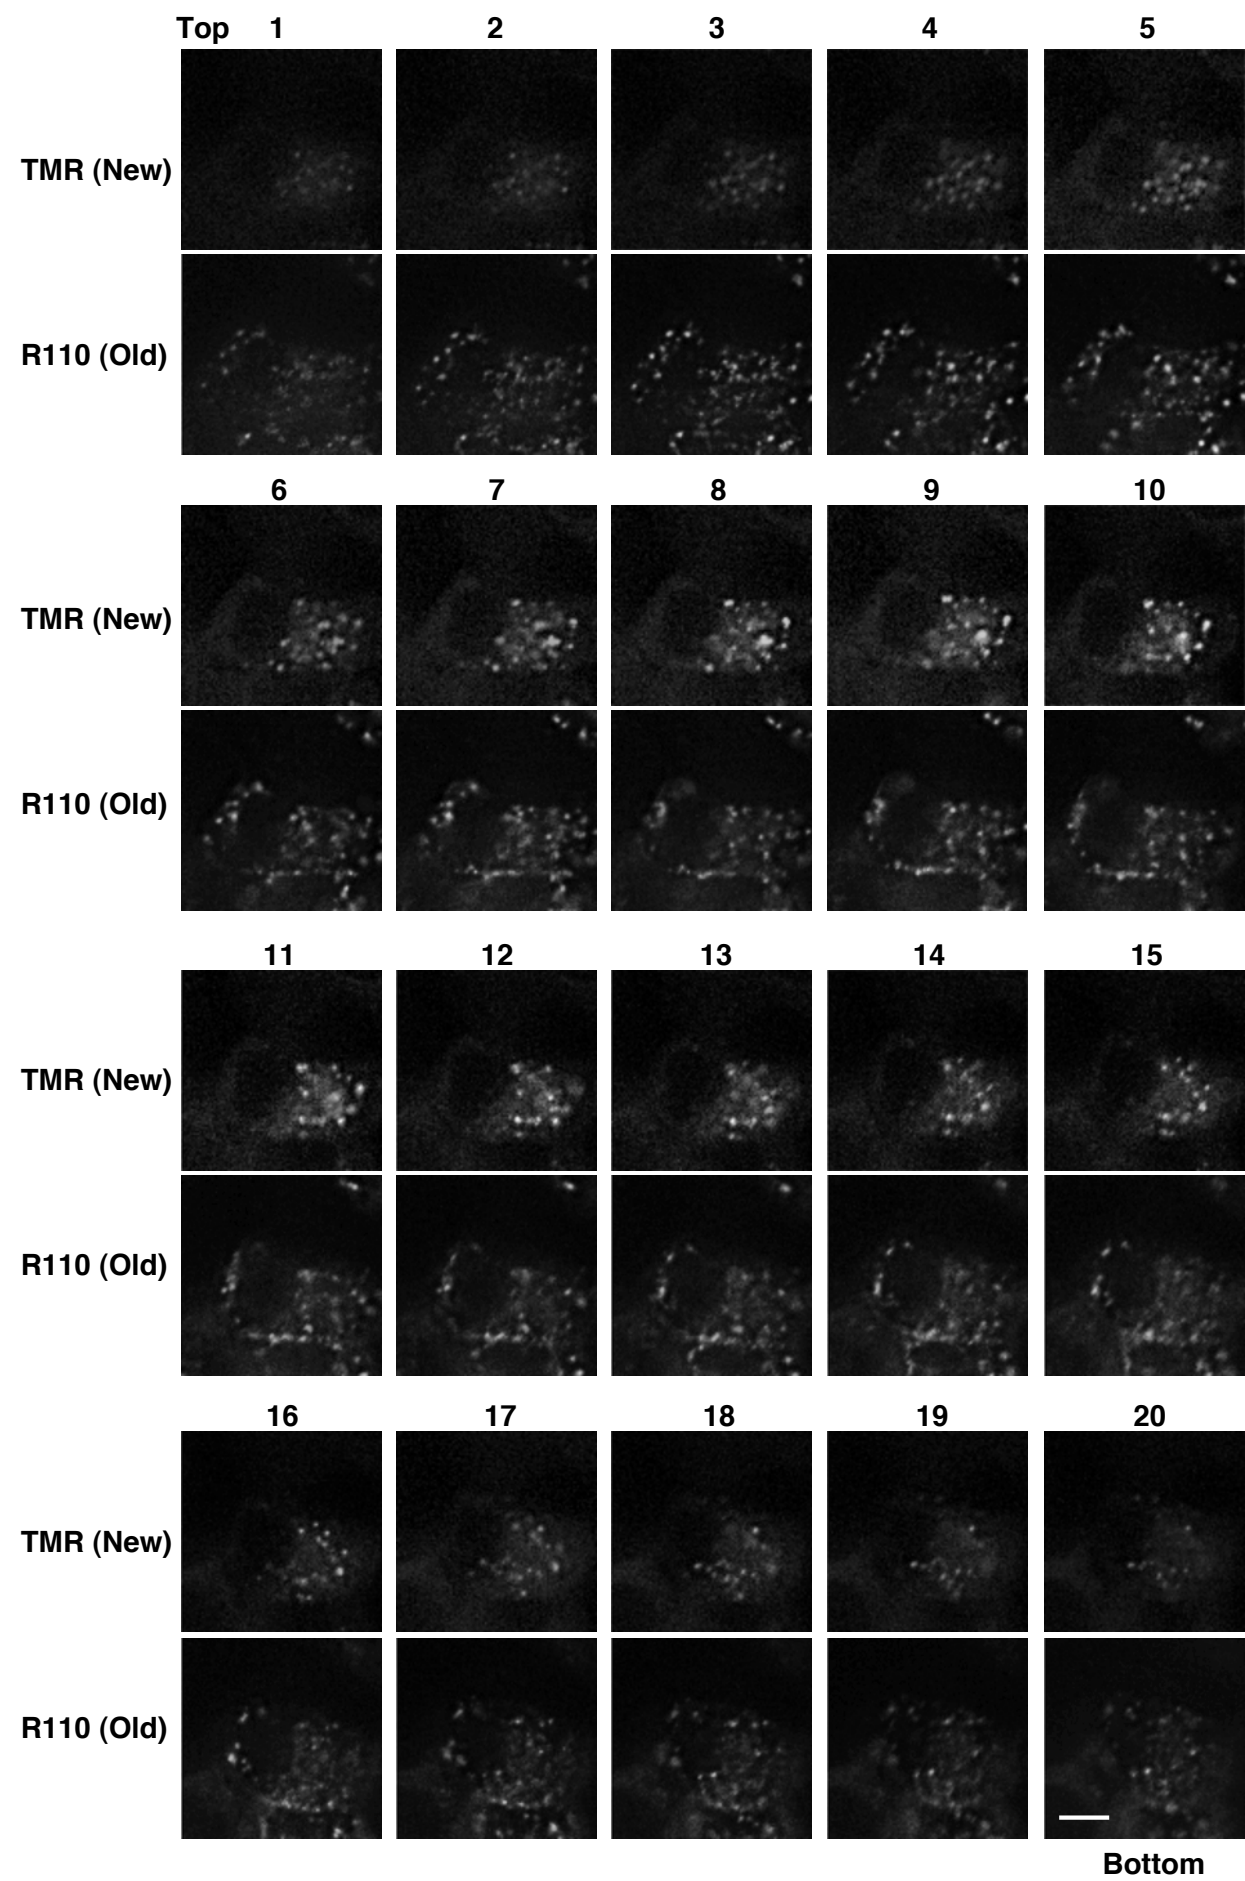

Supplement: S3 (10.1371/journal.pone.0047921.s003) [file journal.pone.0047921.s003]
