# Supplementary material for: Preferential Release of Newly Synthesized Insulin Assessed by a Multi-Label Reporter System Using Pancreatic β-Cell Line MIN6
Source: PLOS journal article supplement (doi:10.1371/journal.pone.0047921), 2012-10-25

**Figure S6 Hou et al.**

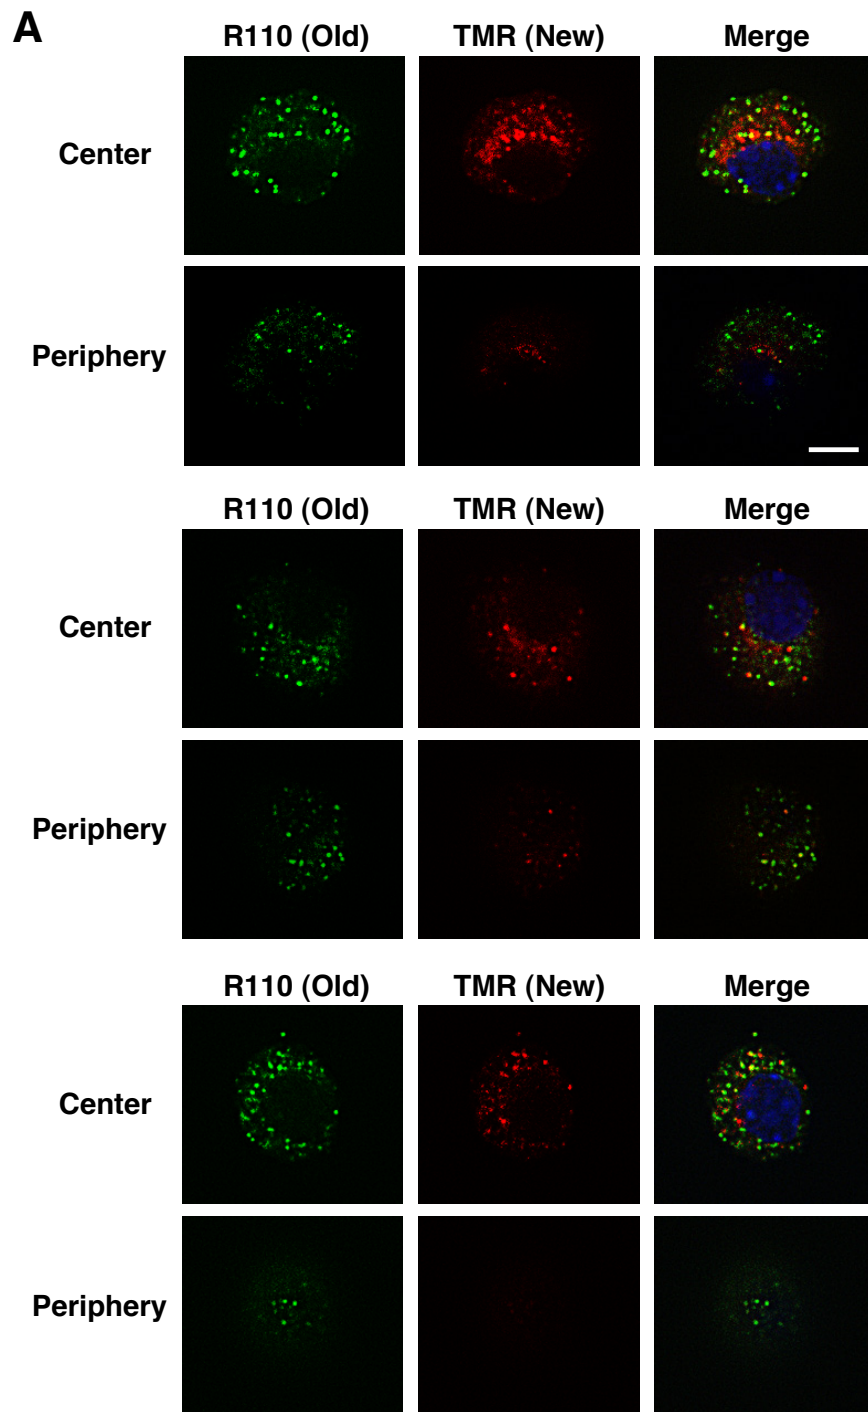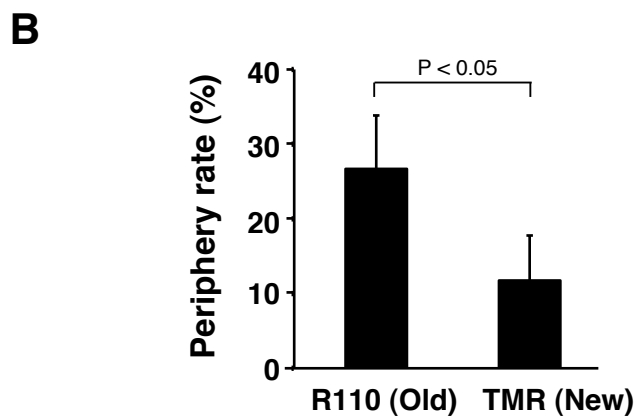

Supplement: S6 (10.1371/journal.pone.0047921.s006) [file journal.pone.0047921.s006]
